# Supplementary material for: Inhibition of Anaplerosis Attenuated Vascular Proliferation in Pulmonary Arterial Hypertension
Source: PubMed Central journal article supplement (PMC7074087; doi:10.3390/jcm9020443), 2020-02-06
Supplement: jcm-09-00443-s001.pdf [file jcm-09-00443-s001.pdf]

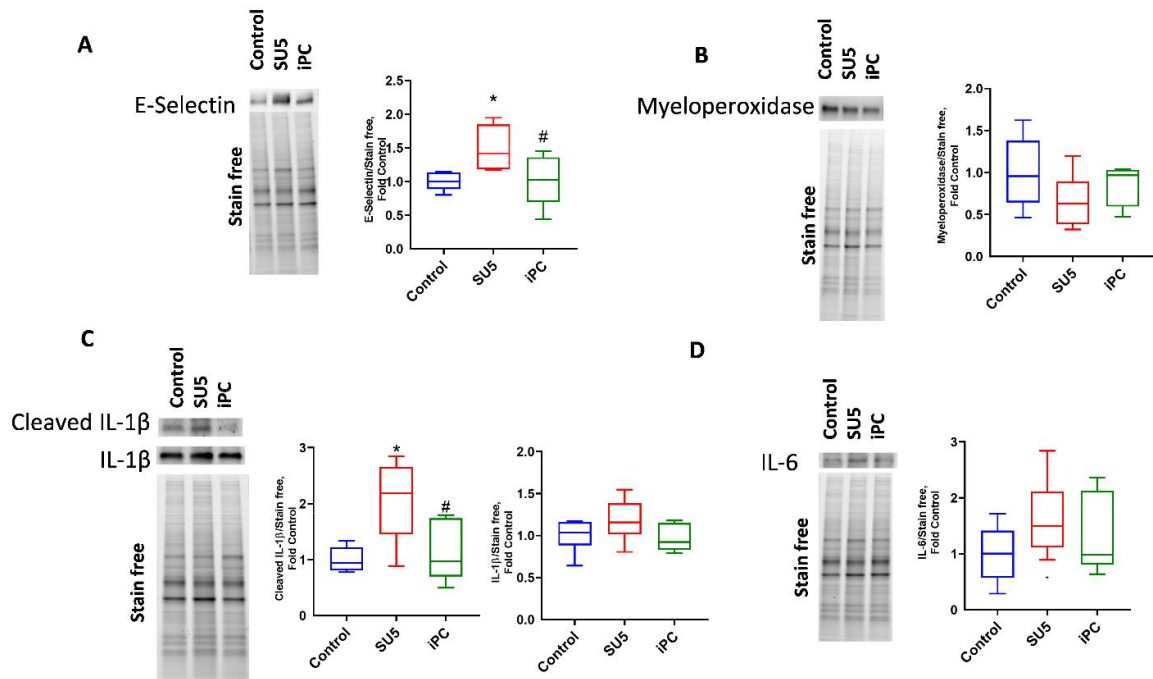

**Supplementary Figure 1.** PC inhibitor attenuated sugen/hypoxia induced inflammation. **(A)** E-selectin expression upregulated in PAH model was found reduced with PC inhibitor treatment. **(B)** Peroxidase enzyme myeloperoxidase was not significantly altered with either PAH induction or PC inhibitor treatment. **(C)** Inflammatory mediator interleukin (IL)1 $\beta$  (cleaved) was found significantly increased in sugen/hypoxic lung tissue and attenuated with PC inhibitor. However, full length transcript (pro-IL1 $\beta$ ) did not show any significant changes. **(D)** Interleukin-6 was not significantly altered in lung tissue of PAH and PAA treatment group. Data expressed as box-and-whisker plot with median value  $\pm$ MinMax, N=5-6, \*  $p < 0.05$  versus control, #  $p < 0.05$  versus SU5 by one way ANOVA. Antibody and dilution details: IL-1  $\beta$  (1:1000) from Abcam (Ab9722); IL-6 (1:500) from Sata Cruz (sc-57315); E-selectin (1:300) from ProteinTech (20894-1-AP); Anti-Myeloperoxidase (1:1000) from Abcam (ab208670).
